# Supplementary material for: Norfloxacin versus alternative antibiotics for prophylaxis of spontaneous bacteria peritonitis in cirrhosis: a systematic review and meta-analysis
Source: Springer Nature journal article supplement (doi:10.1186/s12879-023-08557-6), 2023-08-28
Supplement: MOESM2 [file 25971128]

|               | Random sequence generation (selection bias) | Allocation concealment (selection bias) | Blinding of participants and personnel (performance bias) | Blinding of outcome assessment (detection bias) | Incomplete outcome data (attrition bias) | Selective reporting (reporting bias) |
|---------------|---------------------------------------------|-----------------------------------------|-----------------------------------------------------------|-------------------------------------------------|------------------------------------------|--------------------------------------|
| Alvarez, 2005 | +                                           | +                                       | -                                                         | -                                               | ?                                        | ?                                    |
| Assem, 2016   | +                                           | +                                       | -                                                         | -                                               | +                                        | +                                    |
| Bauer, 2002   | +                                           | ?                                       | -                                                         | ?                                               | +                                        | +                                    |
| Dibya 2022    | +                                           | +                                       | ?                                                         | ?                                               | +                                        | +                                    |
| Elfert, 2016  | +                                           | +                                       | -                                                         | -                                               | +                                        | +                                    |
| Lontos, 2014  | +                                           | +                                       | -                                                         | -                                               | +                                        | +                                    |
| Mostafa, 2015 | ?                                           | ?                                       | -                                                         | -                                               | ?                                        | ?                                    |
| Pande 2012    | +                                           | +                                       | ?                                                         | ?                                               | +                                        | +                                    |
| Sandhu, 2005  | +                                           | ?                                       | -                                                         | +                                               | ?                                        | ?                                    |
| Yim 2018      | +                                           | +                                       | -                                                         | ?                                               | +                                        | +                                    |

**Figure S1.** Quality assessment of the included studies.
