# Supplementary material for: Norfloxacin versus alternative antibiotics for prophylaxis of spontaneous bacteria peritonitis in cirrhosis: a systematic review and meta-analysis
Source: Springer Nature journal article supplement (doi:10.1186/s12879-023-08557-6), 2023-08-28
Supplement: MOESM3 [file 25971128]

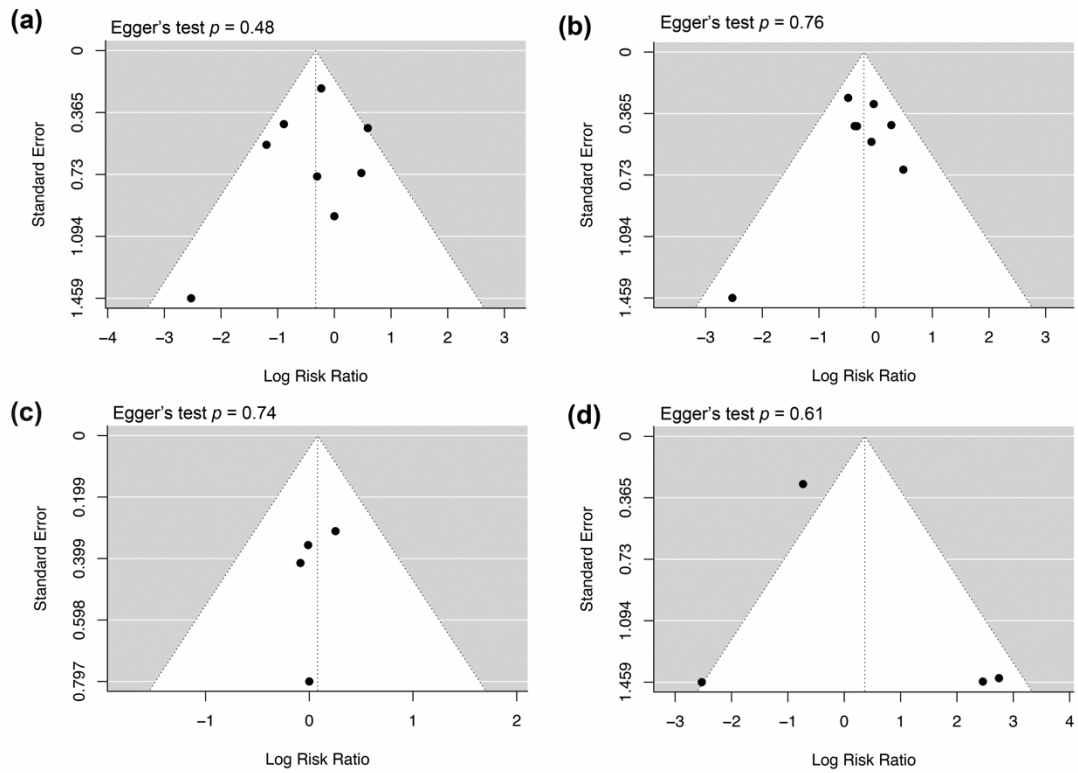

**Figure S2.** Funnel plots to assess publication bias for (a) SBP, (b) mortality, (c) incidence of overall infection, and (d) incidence of adverse events. SBP, spontaneous bacterial peritonitis.
